# Supplementary material
Source: Springer Nature journal article supplement (https://www.springermedizin.de/resource/supplementary/12913_2011_2025_MOESM1_ESM.pdf/9529672)
Supplement: MOESM1 [file 9529672]

# FMEA probability scores

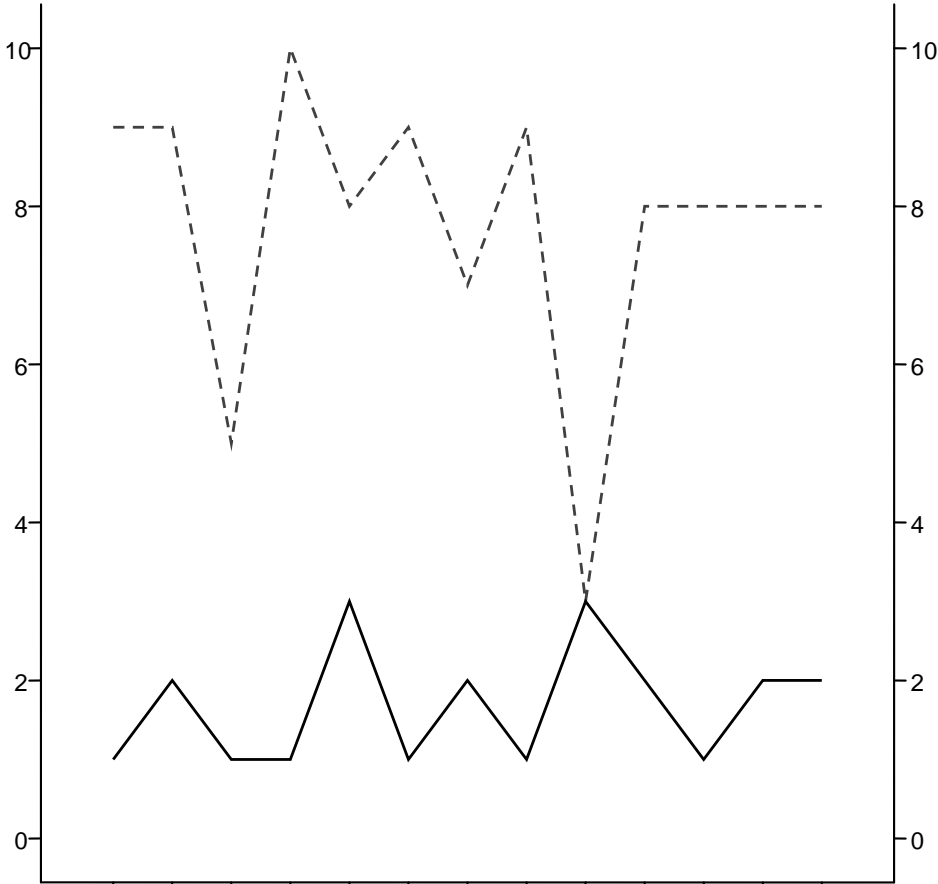

# Number of incidents in the last 3 years (frequency)

- FMEA probability score
- assigned by the FMEA teams
- Number of incidents reported during the last 3 years (frequency)
